# Supplementary material for: A novel Zn–Al spinel-alumina composite supported gold catalyst for efficient CO oxidation
Source: Royal Society of Chemistry journal article supplement (doi:10.1039/d1cc02614c), 2021-01-01
Supplement: d1cc02614c1.pdf [file d1cc02614c1.pdf]

## Supporting Information

### **A novel Zn-Al spinel-alumina composite supported gold catalyst for efficient CO oxidation**

Jingyi Ding <sup>a‡</sup>, Qiang Fang <sup>a‡</sup>, Guodong Huo <sup>a</sup>, Kuo Liu <sup>b\*</sup>, Wei Liu <sup>a,c</sup>, Yaru Zhang <sup>d</sup>, Yang Su <sup>d</sup>, Xuning Li <sup>d</sup>, Xuhua Zou <sup>a</sup>, Xiufeng Xu <sup>a</sup>, Shixue Qi <sup>a</sup>, Wanzhong Ren <sup>c</sup>, Qingquan Lin <sup>a, c\*</sup>

<sup>a</sup> *Institute of Applied Catalysis, College of Chemistry and Chemical Engineering, Yantai University, Yantai 264005, China*

<sup>b</sup> *Research Center for Eco-Environmental Sciences, Chinese Academy of Sciences, Beijing 100085, China*

<sup>c</sup> *Collaborative Innovation Center of Comprehensive Utilization of Light Hydrocarbon Resource, Yantai University, Yantai 264005, Shandong, China*

<sup>d</sup> *CAS Key Laboratory of Science and Technology on Applied Catalysis, Dalian Institute of Chemical Physics, Chinese Academy of Sciences, Dalian 116023, China*

*\*To whom correspondence should be addressed. Email: [Tsqilin@ytu.edu.cn](mailto:Tsqilin@ytu.edu.cn) (Q. Lin), [kuoliu@rcees.ac.cn](mailto:kuoliu@rcees.ac.cn) (K. Liu).*

*‡These authors contributed equally.*

## **1. Experimental methods**

### **1.1. Chemicals**

Al<sub>2</sub>O<sub>3</sub> was purchased from Shandong aluminum Co., Ltd.. HAuCl<sub>4</sub> and Zn(NO<sub>3</sub>)<sub>2</sub> · 6H<sub>2</sub>O were from Sinopharm Chemical Reagent Co., Ltd.. Ammonia (25 %) was from Tianjin Kermiou Chemical Reagent Co., Ltd.. The gases of H<sub>2</sub> and air were purchased from Yantai Feiyuan Special Gas Co., Ltd.. Deionized water was used in all experiments.

### **1.2. Catalyst preparation**

10 wt.% ZnAl<sub>2</sub>O<sub>4</sub>-Al<sub>2</sub>O<sub>3</sub> was prepared by an impregnation method. At first, 0.65 mL Zn(NO<sub>3</sub>)<sub>2</sub> solution (1.87 mol L<sup>-1</sup>) was diluted with deionized water to 1.40 mL. Then 0.90 g Al<sub>2</sub>O<sub>3</sub> was added to the solution and mixed fully. After ageing for 2 hours, the sample was heated up to 120 °C and held for 2 hours, and then was calcined for 4 hours at 850 °C.

1%Au/10 wt.% ZnAl<sub>2</sub>O<sub>4</sub>-Al<sub>2</sub>O<sub>3</sub> was prepared by deposition precipitation (DP) method. Typically, 0.516 g of the HAuCl<sub>4</sub> solution (19.8 g<sub>Au</sub> L<sup>-1</sup>) was diluted with 2.7 g deionized water. Its pH value was adjusted to 8 by adding sodium hydroxide solution (1 mol L<sup>-1</sup>). Subsequently, 1.0 g 10 wt.% ZnO<sub>x</sub>-Al<sub>2</sub>O<sub>3</sub> was added under stirring condition and after 2 h, the catalyst was washed with NH<sub>3</sub>·H<sub>2</sub>O solution (pH = 10~11) and deionized water until no chlorine ion was left, and then dried at 70 °C for 10 h.

### **1.3. Activity tests**

The Au/ZnAl<sub>2</sub>O<sub>4</sub>-Al<sub>2</sub>O<sub>3</sub> catalyst (0.1 g or 0.05 g) was put into a quartz reactor to test its activity. The feed gas, containing 1.0 vol.% CO (balanced with air), passed through the reactor with a flow rate of 100 mL min<sup>-1</sup>. The reaction temperature was 18 °C (the reactor was kept in water at room temperature or water bath). Before the test, the catalysts were in situ reduced with H<sub>2</sub> or air at 573 K for 1 h, and then purged in N<sub>2</sub> and cooled down to room temperature.

The specific reaction rates of CO oxidation were also tested in the U-shape quartz reactor in the feed gas containing 1 vol.% CO and balance air, with a flow rate of 200 mL min<sup>-1</sup>. The conversions of CO were controlled below 15%. 0.01 g (20 - 40 mesh) of the sample was diluted with 0.09 g γ-Al<sub>2</sub>O<sub>3</sub> (20 - 40 mesh). The conversions of CO were used for calculations of the specific reaction rates.

The calculation formulas of CO conversion and reaction rate are the same as those in previous literature.<sup>[1, 2]</sup>

### **1.4. Catalyst characterization**

The crystal phase structure of Au/ZnAl<sub>2</sub>O<sub>4</sub>-Al<sub>2</sub>O<sub>3</sub> was analyzed by X-ray diffraction instrument (Pw3040 / 60 X 'Pert PRO, PANalytical). The Cu Kα monochromatized radiation (λ = 0.1541 nm) was selected. The available scanning range was 10 - 80 ° and its scanning

speed was 20 °min<sup>-1</sup>.

ICP test was used to test the Au loading of the catalyst by IRIS Intrepid II. The test method was the same as that reported before.<sup>[1, 2]</sup>

HAADF-STEM was applied to analyze the Au particle size of Au/ZnAl<sub>2</sub>O<sub>4</sub>-Al<sub>2</sub>O<sub>3</sub> catalysts. Specifically, we adopted a field emission transmission electron microscope with the model of Tecnai G2 F30 S-Twin and the acceleration voltage of 300 kV. Before testing, the catalyst was finely ground and then ultrasonically dispersed in 5 mL ethanol for 5 min. After standing for 10 min, 1-2 drops of the supernatant solution were added to the micro grid, followed by drying and testing.

The change of water content before and after the reaction was measured by low temperature Dew Point Meter (Manufacturer: General Electric Company (GE), Model: Veridri). During the activity test, dew point meters were installed at the inlet and outlet of the quartz reactor, respectively, to record the amount of water moisture at different reaction time. Before test, the two dew point meters were calibrated simultaneously using the same gas.

XPS data of Au/ZnAl<sub>2</sub>O<sub>4</sub>-Al<sub>2</sub>O<sub>3</sub> catalysts were obtained with a ESCALAB 250Xi instrument as reported before.<sup>[1]</sup> Prior to the characterization, the sample was pretreated by H<sub>2</sub> or air.

*In situ* Diffuse Reflectance Infrared Fourier Transform (*In situ* DRIFT) experiments were carried out on a Bruker FT-IR spectrometer (MCT detector, VERTEX 70, Harrick Scientific Products, Inc.) with a resolution of 4 cm<sup>-1</sup> and in a high temperature reaction chamber equipped with ZnSe windows. The catalyst was firstly activated at 573 K with H<sub>2</sub> or air (30 mL min<sup>-1</sup>) for 1 h, respectively, followed by He purge and cooling down to room temperature. Then the background spectrum was recorded. The adsorbed gas (1% CO + 20% O<sub>2</sub> + He) was then introduced into the reaction cell and the IR spectra were recorded.

The X-ray absorption spectra (XAS) were obtained according to the previous report<sup>[3]</sup> at the Zn K-edge (about 9660 eV) in the Japan Synchrotron Radiation Research Institute (JASRI), Japan. The Au/ZnAl<sub>2</sub>O<sub>4</sub>-Al<sub>2</sub>O<sub>3</sub> catalyst was reduced in H<sub>2</sub> at 573 K for 1 h and then purged by inert gas and cooled down to room temperature before the XAS experiment.

**Table S1** Au loading (wt %) of Au/ZnAl<sub>2</sub>O<sub>4</sub>-Al<sub>2</sub>O<sub>3</sub> catalyst

| Catalyst                                                            | Au nominal loading (wt %) | Au actual loading (wt %) |
|---------------------------------------------------------------------|---------------------------|--------------------------|
| Au/ZnAl <sub>2</sub> O <sub>4</sub> -Al <sub>2</sub> O <sub>3</sub> | 1.0                       | 0.62                     |

**Table S2** Representative Au/MO<sub>x</sub> catalysts and their catalytic performances for CO oxidation

| Catalyst                                                                          | Au loading (wt%) | T (°C) | TOF (s <sup>-1</sup> ) | Rate (mol <sub>CO</sub> g <sub>Au</sub> <sup>-1</sup> h <sup>-1</sup> ) | Reference |
|-----------------------------------------------------------------------------------|------------------|--------|------------------------|-------------------------------------------------------------------------|-----------|
| <b>Au/ZnAl<sub>2</sub>O<sub>4</sub>-Al<sub>2</sub>O<sub>3</sub>-H<sub>2</sub></b> | 0.62             | 18     | 0.20                   | 2.35 *                                                                  | This work |
| <b>Au/ZnAl<sub>2</sub>O<sub>4</sub>-Al<sub>2</sub>O<sub>3</sub>-air</b>           | 0.62             | 18     | 0.53                   | 4.74 *                                                                  | This work |
| Au/Al <sub>2</sub> O <sub>3</sub>                                                 | 0.8              | 120    | 0.05                   | 0.26                                                                    | 5         |
| Au/Al <sub>2</sub> O <sub>3</sub>                                                 | 2.4              | 0      | 0.14                   | 1.43                                                                    | 6         |
| Au/Al <sub>2</sub> O <sub>3</sub>                                                 | 2.08             | 20     | 0.088                  | 1.60                                                                    | 7         |
| Au/Al <sub>2</sub> O <sub>3</sub>                                                 | 1.0              | 25     | 0.25                   | 1.62                                                                    | 8         |
| Au/Al <sub>2</sub> O <sub>3</sub>                                                 | 0.53             | 30     | 0.096                  | 2.11                                                                    | 9         |
| Au/SiO <sub>2</sub>                                                               | 0.94             | 30     | 0.01                   | 0.06                                                                    | 10        |
| Au/SiO <sub>2</sub>                                                               | 6.6              | 0      | 0.02                   | 0.06                                                                    | 4         |
| Au/ZrO <sub>2</sub>                                                               | 1.0              | 120    | 0.37                   | 2.82                                                                    | 11        |
| Au/FeO <sub>x</sub>                                                               | 5.0              | 25     | 0.42                   | -                                                                       | 12        |
| Au/FeO <sub>x</sub>                                                               | 0.015            | 24     | 0.49                   | -                                                                       | 13        |
| Au/FeO <sub>x</sub>                                                               | 1.0              | 25     | 0.50–1.0               | 4.4–8.7                                                                 | 14        |
| Au/Fe <sub>2</sub> O <sub>3</sub>                                                 | 0.66             | 0      | 0.14                   | 1.07                                                                    | 4         |
| Au/ZnO                                                                            | 1.0              | 120    | 0.24                   | 1.41                                                                    | 15        |
| Au/ZnO                                                                            | 3.8              | 20     | 0.03                   | 0.32                                                                    | 16        |
| Au/TiO <sub>2</sub>                                                               | 3.1              | 27     | 0.26                   | 1.64                                                                    | 17        |

\* This is the reaction rate at 450 min.

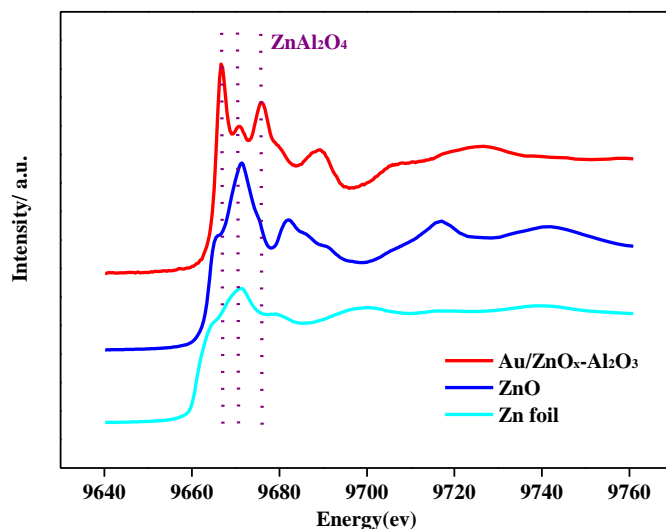

**Fig. S1 Normalized XANES spectra at Zn K-edge for Au/ZnO<sub>x</sub>-Al<sub>2</sub>O<sub>3</sub>-H<sub>2</sub>**

As shown in Fig. S1, spectral feature of Au/ZnO/Al<sub>2</sub>O<sub>3</sub> was quite different from those of ZnO and Zn foil but similar to that of ZnAl<sub>2</sub>O<sub>4</sub>. The peaks of Au/ZnO/Al<sub>2</sub>O<sub>3</sub> were observed at 9667, 9671, and 9676 eV, which were in good agreement with ZnAl<sub>2</sub>O<sub>4</sub> as reported in the previous literature<sup>[18-20]</sup>. Therefore, ZnAl<sub>2</sub>O<sub>4</sub> spinel was successfully synthesized.

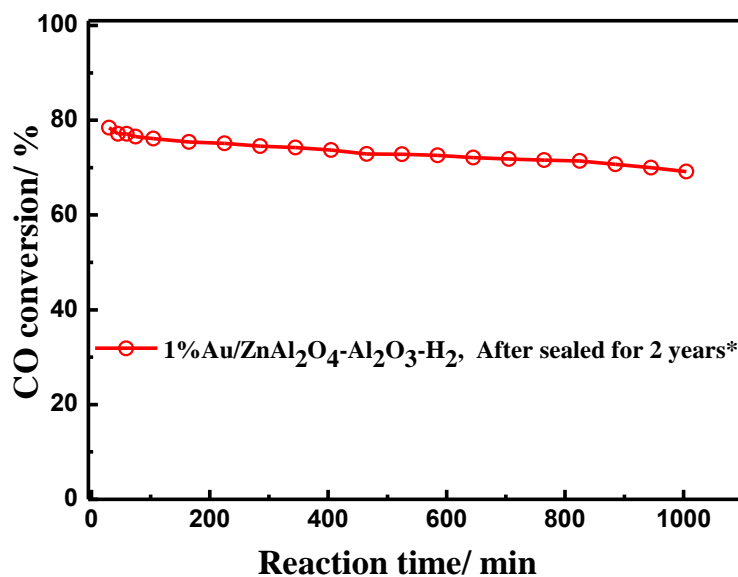

**Fig. S2** CO conversions as a function of reaction time over Au/ZnAl<sub>2</sub>O<sub>4</sub>-Al<sub>2</sub>O<sub>3</sub>-H<sub>2</sub> sealed in a sample tube for 2 years (1 vol.% CO + air, GHSV: 120, 000 mL g<sup>-1</sup> h<sup>-1</sup>. Reaction temperature: 18 °C;

**After sealed for 2 years\*:** After activation, exposure to air, the catalyst was sealed in a sample tube in a desiccator and kept away from light for 2 years.

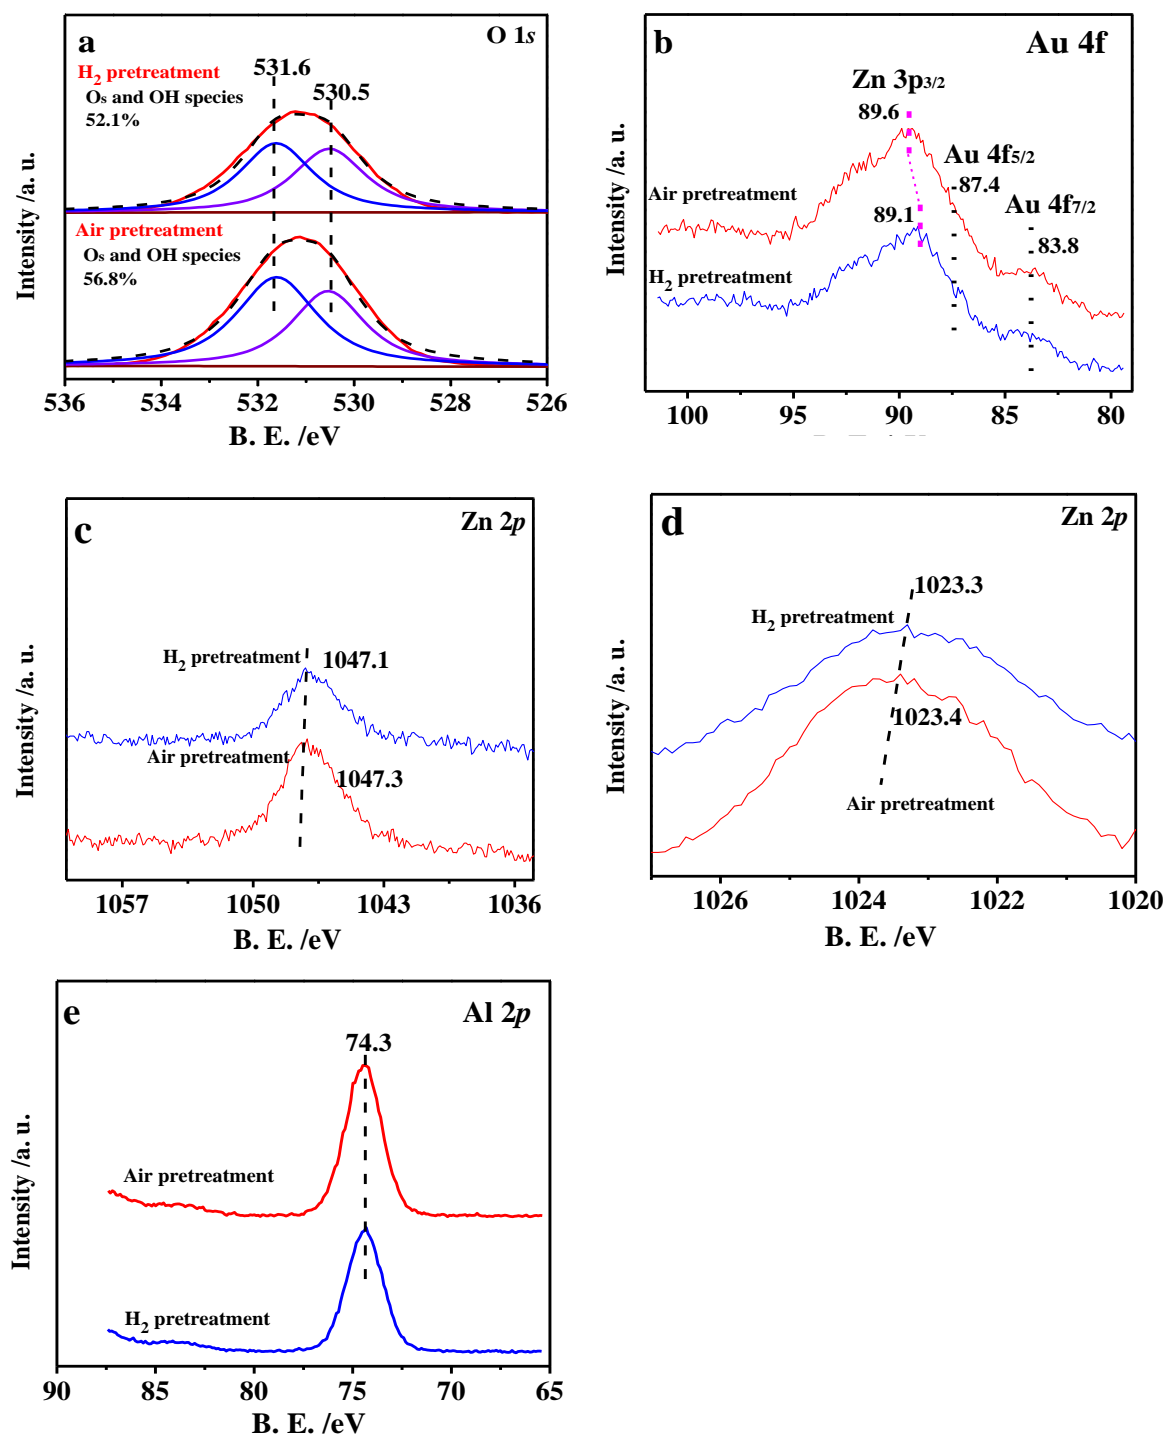

**Fig. S3** XPS spectra of (a) O 1s, (b) Au 4f, (c,d) Zn 2p, and (e) Al 2p over Au/ZnAl<sub>2</sub>O<sub>4</sub>-Al<sub>2</sub>O<sub>3</sub> (-air or -H<sub>2</sub>).

The spectra of O1s can be deconvoluted into two peaks. The band at a lower B.E. of 530.5 eV can be attributed to lattice oxygen species (O<sup>2-</sup>) in Al<sub>2</sub>O<sub>3</sub> or ZnAl<sub>2</sub>O<sub>4</sub> <sup>[21]</sup>, while the band at a higher B.E. of 531.6 eV is characteristic of the surface oxygen (O<sub>2</sub><sup>-</sup>, O<sup>-</sup>) and OH species <sup>[22]</sup>. The Au 4f<sub>7/2</sub> (c.a. 83.8 eV) peaks are similar for Au/ZnAl<sub>2</sub>O<sub>4</sub>-Al<sub>2</sub>O<sub>3</sub>-H<sub>2</sub> and

Au/ZnAl<sub>2</sub>O<sub>4</sub>-Al<sub>2</sub>O<sub>3</sub>-air, indicating the presence of Au<sup>0</sup>. The BE peaks at 87.4 and 89.1 eV are ascribed to Au 4f<sub>5/2</sub> and Zn 3p<sub>3/2</sub>, respectively. A shift of binding energy peak of Zn 3p<sub>3/2</sub> (89.6 to 89.1 eV) appeared for Au/ZnAl<sub>2</sub>O<sub>4</sub>-Al<sub>2</sub>O<sub>3</sub>-air (**Fig. S3b**), which might be the result of the effect of Au 4f<sub>5/2</sub> or the partial reduction of Zn<sup>2+</sup>. The main peaks of Zn 2p<sub>1/2</sub> and Zn 2p<sub>3/2</sub> are usually centered at 1045 eV and 1023 eV <sup>[23]</sup>, respectively. However, these peaks slightly shifted from 1047.3 eV and 1023.4 eV (Au/ZnAl<sub>2</sub>O<sub>4</sub>-Al<sub>2</sub>O<sub>3</sub>-air) to 1047.1 eV and 1023.3 eV (Au/ZnAl<sub>2</sub>O<sub>4</sub>-Al<sub>2</sub>O<sub>3</sub>-H<sub>2</sub>), respectively (**Fig. S3c**). This is probably due to partial reduction of Zn<sup>2+</sup> species in Au/ZnAl<sub>2</sub>O<sub>4</sub>-Al<sub>2</sub>O<sub>3</sub>-H<sub>2</sub> when pre-treated in H<sub>2</sub> <sup>[24, 25]</sup>.

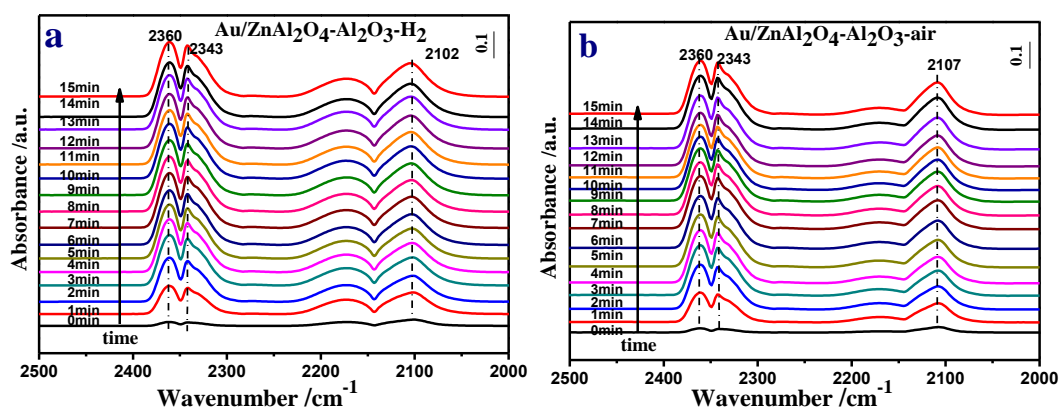

**Fig. S4** *In situ* DRIFT spectra ( $2000 \sim 2500 \text{ cm}^{-1}$ ) of  $\text{Au/ZnAl}_2\text{O}_4\text{-Al}_2\text{O}_3\text{-H}_2$  and  $\text{Au/ZnAl}_2\text{O}_4\text{-Al}_2\text{O}_3\text{-air}$  exposed to the reaction gas of CO oxidation at room temperature  
Reaction conditions: 1% CO, 20% O<sub>2</sub>, He balance.

When the catalysts were exposed to CO + O<sub>2</sub> at room temperature, several bands were observed in the range of  $2000 \sim 2500 \text{ cm}^{-1}$ . The band at  $2170 \text{ cm}^{-1}$  on the two catalysts could be ascribed to vibration absorption peak of the gaseous CO. Generally, the band at about  $2110 \text{ cm}^{-1}$  could be assigned to the vibration of linear adsorption of CO on Au<sup>0</sup> [1, 26, 27, 28], and on our samples the bands at  $2102 \text{ cm}^{-1}$  and  $2107 \text{ cm}^{-1}$  ascribed to CO on Au species were observed on  $\text{Au/ZnAl}_2\text{O}_4\text{-Al}_2\text{O}_3\text{-H}_2$  and  $\text{Au/ZnAl}_2\text{O}_4\text{-Al}_2\text{O}_3\text{-air}$  during the initial 15 min, respectively (Fig. S4a, 4b).

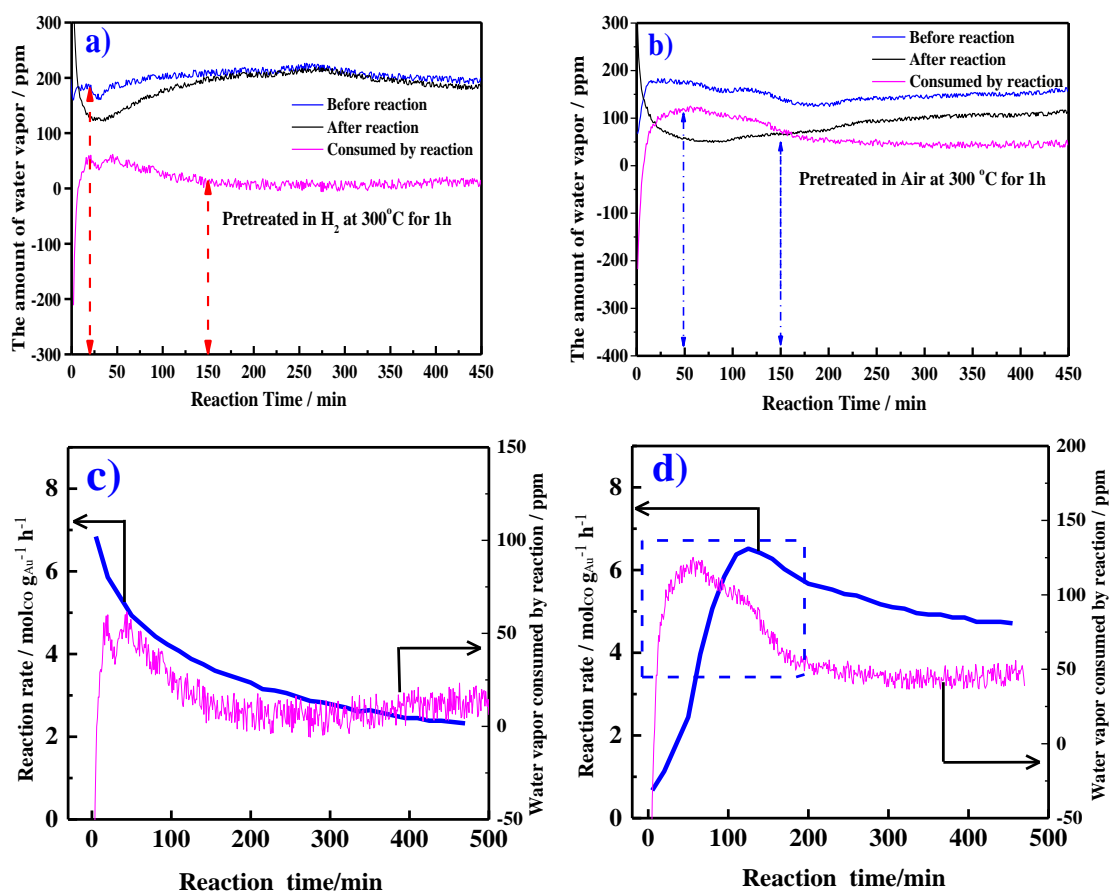

**Fig. S5** Water vapor consumed by reaction as a function of time over Au/ZnAl<sub>2</sub>O<sub>4</sub>-Al<sub>2</sub>O<sub>3</sub> after pretreatment with (a) H<sub>2</sub> or (b) air, and reaction rates on (c) Au/ZnAl<sub>2</sub>O<sub>4</sub>-Al<sub>2</sub>O<sub>3</sub>-H<sub>2</sub> and (d) Au/ZnAl<sub>2</sub>O<sub>4</sub>-Al<sub>2</sub>O<sub>3</sub>-Air.

Feed gases: 1 vol.% CO + Air, GHSV: 1, 200, 000 mL g<sup>-1</sup> h<sup>-1</sup>, Temperature: 18 °C

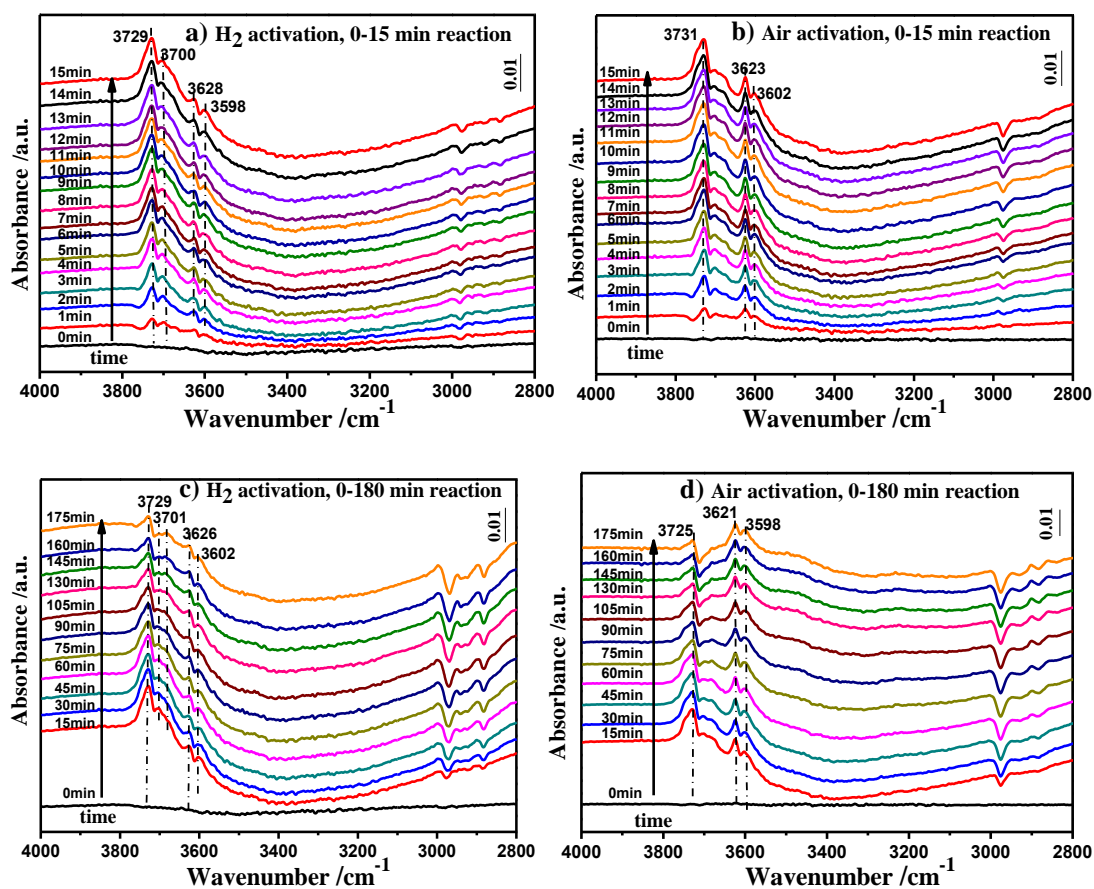

**Fig. S6** *In situ* DRIFT spectra (2800 ~ 4000 cm<sup>-1</sup>) of Au/ZnAl<sub>2</sub>O<sub>4</sub>-Al<sub>2</sub>O<sub>3</sub>-H<sub>2</sub> and Au/ZnAl<sub>2</sub>O<sub>4</sub>-Al<sub>2</sub>O<sub>3</sub>-air exposed to the reaction gas of CO oxidation at room temperature.

Au/ZnAl<sub>2</sub>O<sub>4</sub>-Al<sub>2</sub>O<sub>3</sub> was pretreated by H<sub>2</sub> (Au/ZnAl<sub>2</sub>O<sub>4</sub>-Al<sub>2</sub>O<sub>3</sub>-H<sub>2</sub>) or air (Au/ZnAl<sub>2</sub>O<sub>4</sub>-Al<sub>2</sub>O<sub>3</sub>-air) at 573 K for 1 h. Reaction conditions: 1% CO, 20% O<sub>2</sub>, He balance.

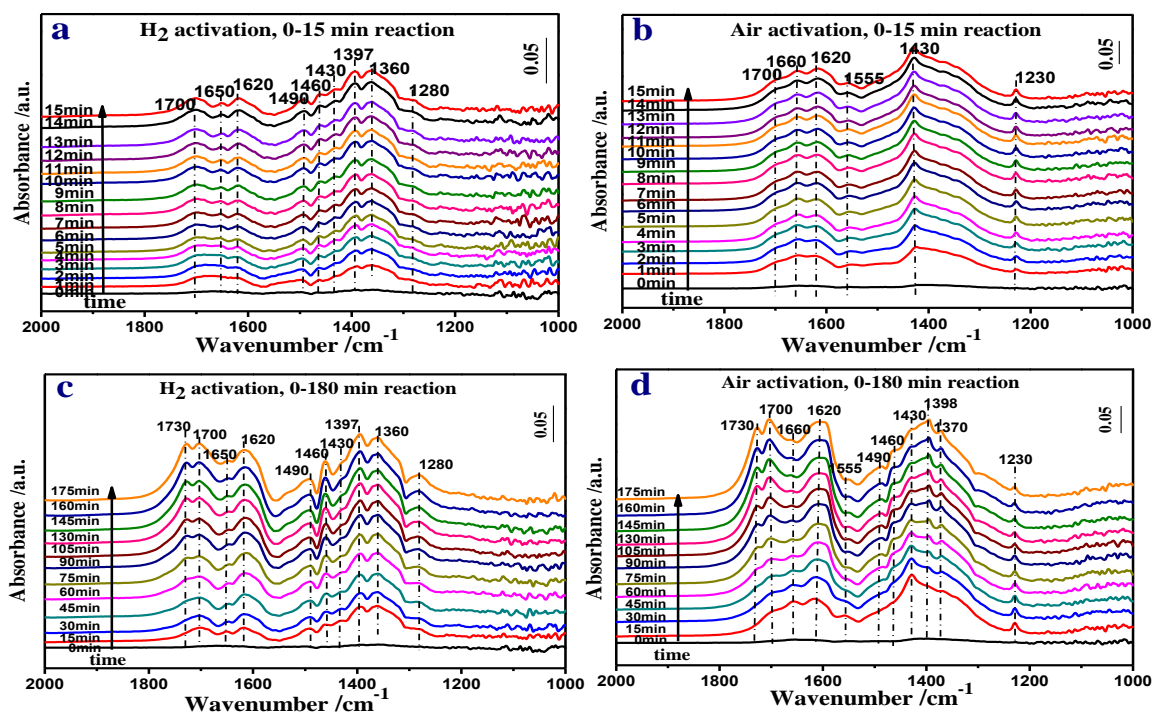

**Fig. S7** *In situ* DRIFT spectra ( $1000 \sim 2000 \text{ cm}^{-1}$ ) of Au/ZnAl<sub>2</sub>O<sub>4</sub>-Al<sub>2</sub>O<sub>3</sub>-H<sub>2</sub> and Au/ZnAl<sub>2</sub>O<sub>4</sub>-Al<sub>2</sub>O<sub>3</sub>-air exposed to the reaction gas of CO oxidation at room temperature.

Au/ZnAl<sub>2</sub>O<sub>4</sub>-Al<sub>2</sub>O<sub>3</sub> was pretreated by H<sub>2</sub> (Au/ZnAl<sub>2</sub>O<sub>4</sub>-Al<sub>2</sub>O<sub>3</sub>-H<sub>2</sub>) or air (Au/ZnAl<sub>2</sub>O<sub>4</sub>-Al<sub>2</sub>O<sub>3</sub>-air) at 573 K for 1 h. Reaction conditions: 1% CO, 20% O<sub>2</sub>, He balance.

## References:

- 1 Q. Lin, B. Qiao, Y. Huang, L. Li, J. Lin, X. Y. Liu, A. Wang, W. C. Li and T. Zhang, *Chem. Commun.*, 2014, **50**, 2721-2724.
- 2 Q. Fang, H. Li, Q. Lin, K. Liu, Y. Su, G. Huo, X. Zou, X. Xu, H. Wei and S. Qi, *RSC Adv.*, 2020, **10**, 22921-22928.
- 3 Q. Lin, C. Han, H. Su, L. Sun, T. Ishida, T. Honma, X. Sun and Y. Zheng, C. Qi, *RSC Adv.* 2017, **7**, 38780.
- 4 B. Qiao, J. Liang, A. Wang, J. Li, and T. Zhang, *Chin. J. Catal.*, 2016, **37**, 1580-1586.
- 5 D. Widmann, Y. Liu, F. Schüth and R. J. Behm, *J. Catal.*, 2010, **276**, 292-305.
- 6 J. Wang, A. H. Lu, M. R. Li, W. P. Zhang, Y. S. Chen, D. X. Tian and W. C. Li, *ACS Nano.*, 2013, **7**, 4902-4910.
- 7 A. F. An, A. H. Lu, Q. Sun, J. Wang and W. C. Li, *Gold Bull.*, 2011, **44**, 217-222.
- 8 Y. Han, Z. Zhong, K. Ramesh, F. Chen and L. Chen, *J. Phys. Chem. C.*, 2017, **111**, 3163-3170.
- 9 Y. X. Miao, L. Shi, L.N. Cai and W. C. Li, *Gold Bull.*, 2014, **47**, 275-282.
- 10 J.A. Rodriguez, D.C. Grinter, P. J. Ramírez, D. J. Stacchiola and S. J. Senanayake, *J. Phys. Chem. C.*, 2018, **122**, 4324-4330.
- 11 M. Okumura, S. Nakamura, S. Tsubota, N. Toshiko, M. Azuma and M. Haruta, *Catal. Lett.*, 1998, **51**, 53-58.
- 12 Q. He, S. J. Freakley, J. K. Edwards, A. F. Carley, A.Y. Borisevich, Y. Mineo, M. Haruta, G. J. Hutchings and C. J. Kiely, *Nat. Commun.*, 2016, **7**, 12905-12912.
- 13 B. Qiao, J. X. Liang, A. Wang, C. Q. Xu, J. Li, T. Zhang and J. J. Liu, *Nano Res.*, 2015, **8**, 2913-2924.
- 14 Y. Liu, N. Jia, J. Yamasaki, O. Terasaki and F. Schüth, *Angew. Chem. Int. Ed.*, 2010, **49**, 5771-5775.
- 15 M. Haruta, S. Tsubota, T. Kobayashi, H. Kageyama, M. J. Genet and B. Delmon, *J. Catal.*, 1993, **144**, 175-192.
- 16 T. Fujita, T. Ishida, K. Shibamoto, T. Honma, H. Ohashi, T. Murayama and M. Haruta, *ACS Catal.*, 2019, **9**, 8364-8372.
- 17 G. R. Bamwenda, S. Tsubota, T. Nakamura and M. Haruta, *Catal. Lett.*, 1997, **44**, 83-87.
- 18 W. Mekprasart, S. Worasawat, T. Tangcharoen, W. Pecharapa, *Phys. Status Solidi C* 2015, **12**, 624-627.
- 19 S. Pin, M. Suardelli, F. D'Acapito, G. Spinolo, M. Zema, S. C. Tarantino, L. Barba, P. Ghigna, *J. Phys. Chem. C* 2013, **117**, 6113-6119.
- 20 S. Chen, Y. Wu, P. Cui, W. Chu, X. Chen, Z. Wu, *J. Phys. Chem. C* 2013, **117**, 25019-25025.

- 21 W. Fang, C. Pirez, S. Paul, M. Jiménez-Ruiz, H. Jobic, F. Dumeignil and L. Jallowiecki-Duhamel, *Int. J. Hydrogen Energ.*, 2016, **41**, 15443-15452.
- 22 1) Y. Ren, K. Tang, J. Wei, H. Yang, H. Wei and Y. Yang, *Energy Technol.-GER.*, 2018, **6**, 379-390. 2) S. Wu, W. Sun, J. Chen, J. Zhao, Q. Cao, W. Fang, Q. Zhao, *J. Catal.*, 2019, **377**, 110-121.
- 23 Y. Geng, L. Guo, S.S. Xu, Q.Q. Sun, S.J. Ding, H.L. Lu and D.W. Zhang, *J. Phys. Chem. C.*, 2011, **115**, 12317-12321.
- 24 L. Wang, L. He, Y. Liu, Y. Cao, H. He, K. Fan and J. Zhuang, *J. Catal.*, 2009, **24**, 145-153.
- 25 Z. Wang, H. Fu, Z. Tian, D. Han and F. Gu, *Nanoscale.*, 2016, **8**, 5865-5872.
- 26 T. Venkov, H. Klimev, M. Centeno, J. Odriozola and K. Hadjiivanov, *Catal. Commun.*, 2006, **7**, 308-313.
- 27 C. Tian, S.H. Chai, X. Zhu, Z. Wu, A. Binder, J.C. Bauer, S. Brwon, M. Chi, G.M. Veith, Y. Guo and S. Dai, *J. Mater. Chem.* 2012, **22**, 25227-25235.
- 28 M. Mihaylov, H. Knözinger, K. Hadjiivanov, and B.C. Gates, *Chem.-Ing.-Tech.*, 2007, **79**, 795-806.
